# Supplementary material for: The impact of post-deposition annealing on the performance of solution-processed single layer In2O3 and isotype In2O3/ZnO heterojunction transistors
Source: Royal Society of Chemistry journal article supplement (doi:10.1039/c6tc04907a), 2016-12-15
Supplement: c6tc04907a1.pdf [file c6tc04907a1.pdf]

## Supplementary Information

### The impact of post-deposition annealing on the performance of solution-processed single layer $\text{In}_2\text{O}_3$ and isotype $\text{In}_2\text{O}_3/\text{ZnO}$ heterojunction transistors

Kornelius Tetzner,<sup>\*a</sup> Ivan Isakov<sup>a</sup>, Anna Regoutz,<sup>b</sup> David Payne<sup>b</sup> and Thomas D. Anthopoulos<sup>\*a</sup>

<sup>a</sup>Department of Physics and Centre for Plastic Electronics, Blackett Laboratory, Imperial College London, London SW7 2BW, United Kingdom,

\*E-Mail: [k.tetzner@imperial.ac.uk](mailto:k.tetzner@imperial.ac.uk); [thomas.anthopoulos@imperial.ac.uk](mailto:thomas.anthopoulos@imperial.ac.uk)

<sup>b</sup>Department of Materials, London Royal School of Mines, Imperial College London, London SW7 2AZ, United Kingdom

### Section S11. Experimental results and theoretical analysis

**Table S1.** Thickness of solution-processed  $\text{In}_2\text{O}_3$  and ZnO layers annealed at various temperatures as measured by optical ellipsometry.

| Annealing temperature (°C) | Layer thickness (nm) |                         |
|----------------------------|----------------------|-------------------------|
|                            | ZnO                  | $\text{In}_2\text{O}_3$ |
| 200 °C                     | 7.0                  | 6.5                     |
| 300 °C                     | 6.8                  | 5.8                     |
| 400 °C                     | 7.2                  | 5.9                     |
| 600 °C                     | 8.5                  | 6.7                     |

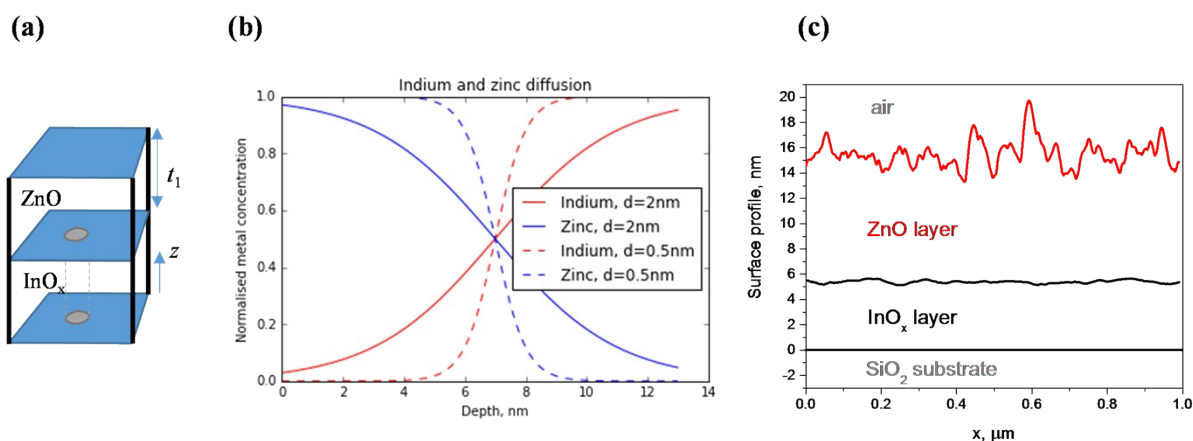

**Figure S1.** (a) Illustration of a simulation model with a bilayer film: a thin cylinder with flat bases is first considered for the XPS signal calculation. (b) Examples of atomic profile of the bilayer from a flat cylinder with different diffusion constants: 2 nm (solid line) and 0.5 nm (dashed line). (c) Example of a rough profile of a bilayer structure.

In order to calculate the XPS signal from zinc and indium atoms we assume a simple model illustrated in **Fig. S1(a)**. Vertical distribution of the atomic concentrations  $d_i$  depends on zinc oxide thickness  $t_1$  and diffusion coefficient  $d$ :

$$d_{Zn} = \frac{1}{\left[\exp\left(\frac{(z-t_1)}{d}\right) + 1\right]} \text{ for Zn and} \quad (\text{SI-1})$$

$$d_{In} = 1 - \frac{1}{\left[\exp\left(\frac{(z-t_1)}{d}\right) + 1\right]} \text{ for In} \quad (\text{SI-2})$$

The example of the atomic profile is shown in **Fig. S1(b)**. The approximate XPS signal intensity depends exponentially on the inelastic mean free path  $l$  which is equal 2 nm for the studied films. Thus in order to calculate the XPS signal intensity  $dI$  from the zinc atoms in a flat thin cylinder, we need to solve the following integral:

$$dI_{Zn} = \int_0^{\infty} \frac{\exp\left(-\frac{z}{l}\right)}{\exp\left(\frac{(z-t_1)}{d}\right) + 1} dz \quad (\text{SI-3})$$

In general, the thickness is a variable which depends on roughness. Here we assume a similar roughness in both  $x$  and  $y$  direction (**Fig. S1(c)**). From histograms in **Fig.1 (c)** we can get the distribution of the deviations  $\delta t_1$  from the average thickness  $t_{1avg}$ :  $P_{Zn}(\delta t_1)$ , where deviation is defined as  $t_1 = t_{1avg} + \delta t_1$ . Therefore we obtain the following expression for the average signal from zinc atoms:

$$I_{Zn} = \int_{\delta t_1} \int_0^{\infty} \frac{P_{Zn}(\delta t_1) \cdot \exp\left(-\frac{z}{l}\right)}{\exp\left(\frac{(z-t_{1avg} + \delta t_1)}{d}\right) + 1} dz d\delta t_1 \quad (\text{SI-4})$$

In order to get a similar expression for indium atoms, it is necessary to integrate the flat cylinder intensity by both ZnO and InO<sub>x</sub> roughness:

$$I_{In} = \int_{\delta t_1} \int_{\delta t_2} \int_0^{\infty} P_{Zn}(\delta t_1) P_{In}(\delta t_2) \exp\left(-\frac{z}{l}\right) \left[1 - \frac{1}{\exp\left(\frac{(z-t_{1avg} + \delta t_1 + \delta t_2)}{d}\right) + 1}\right] dz d\delta t_1 d\delta t_2. \quad (\text{SI-5})$$

For comparison between XPS signal intensities from indium and zinc, we assume equal concentration of indium and zinc atoms in indium oxide and zinc oxide layers respectively. The Zn:In ratio is calculated simply as  $I_{Zn}/I_{In}$ . The diffusion coefficients derived from the fitting between the experimental ratio and calculated ratio are shown in the **Table S2** below:

**Table S2.** Summary of elemental composition measured via XPS, layer surface roughness and simulated diffusion coefficients as a function of annealing temperature.

| Annealing temperature<br>(°C) | Experimental Zn:In ratio, from XPS | Roughness (nm) |                  | Simulated diffusion coefficient (nm) |
|-------------------------------|------------------------------------|----------------|------------------|--------------------------------------|
|                               |                                    | ZnO            | InO <sub>x</sub> |                                      |
|                               |                                    |                |                  |                                      |

|     |       |     |      |     |
|-----|-------|-----|------|-----|
| 200 | 96:4  | 2.5 | 0.22 | 0.5 |
| 300 | 96:4  | 2.7 | 0.25 | 0.5 |
| 400 | 91:9  | 2.6 | 0.8  | 1.4 |
| 600 | 81:19 | 4.4 | 1.3  | 2.9 |

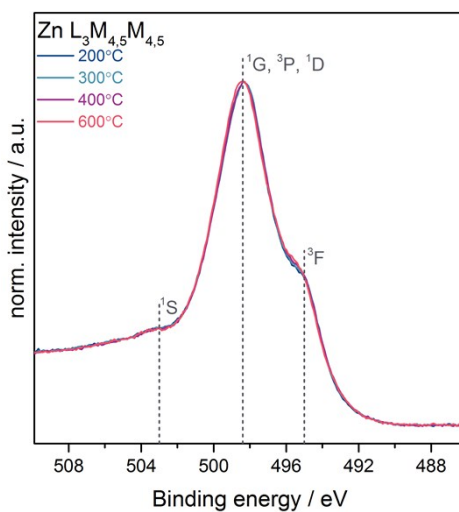

**Figure S2.** Zn  $L_{3}M_{4,5}M_{4,5}$  Auger line of the  $In_2O_3/ZnO$  bilayer samples annealed at varying temperatures.

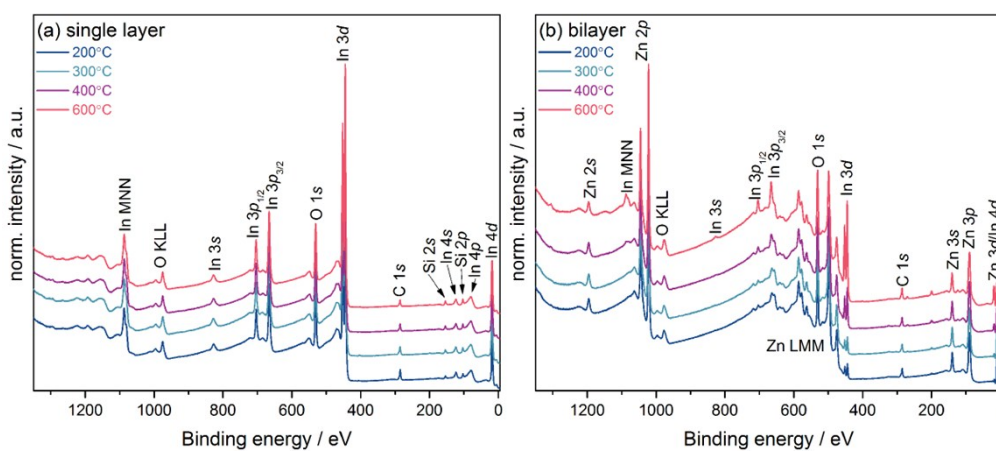

**Figure S3.** XPS survey spectra of the (a)  $In_2O_3$  single layer and the (b)  $In_2O_3/ZnO$  bilayer samples annealed at varying temperatures.

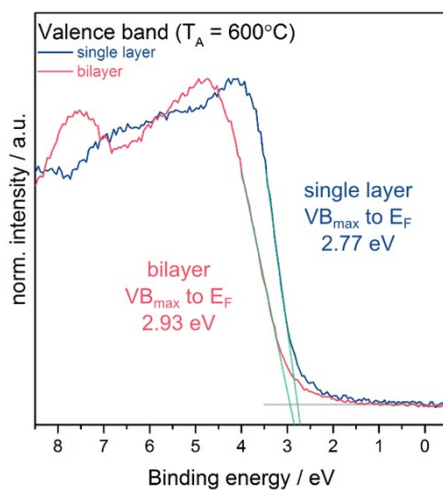

**Figure S4.** XPS valence band spectra of the  $\text{In}_2\text{O}_3$  single layer and the  $\text{In}_2\text{O}_3/\text{ZnO}$  bilayer samples annealed at  $600^\circ\text{C}$  including the linear fits used to determine the  $\text{VB}_{\text{max}}$  to  $E_F$  separation.

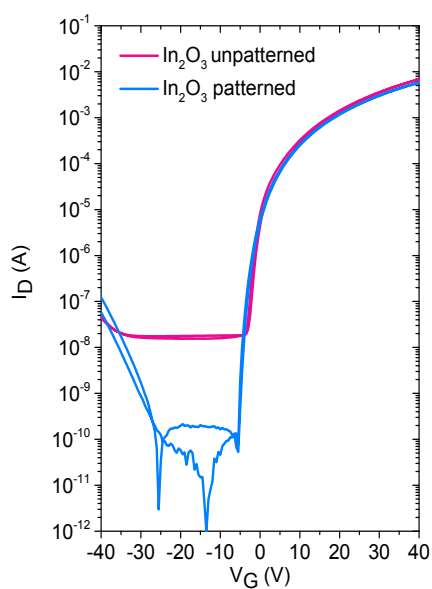

**Figure S5.** Transfer curves of patterned and un-patterned  $\text{In}_2\text{O}_3$  single layer transistors annealed at  $400^\circ\text{C}$ .
